# Supplementary material for: Association of Daily Physical Activity and Sedentary Behaviour with Protein Intake Patterns in Older Adults: A Multi-Study Analysis across Five Countries
Source: Nutrients. 2021 Jul 27;13(8):2574. doi: 10.3390/nu13082574 (PMC8398631; doi:10.3390/nu13082574)
Supplement: Supplementary file 1 [file nutrients-13-02574-s001.zip › nutrients-1281268-supplementary.pdf]

## **Supplementary material**

### **Methods**

#### ***Protein intake patterns-eating occasions***

In the *Newcastle 85+ Study* and *LiLACS NZ*, to describe the timing of protein intake, protein intake (absolute and as a proportion of total protein intake) was calculated for seven eating occasions dividing the 24-hour period into three-hour slots (from 05:30 to 23:29) plus six hours 23:30-5:29, as previously [1]. The eating occasions were subsequently classified as breakfast, morning snack, lunch, afternoon snack, dinner, evening snack, and overnight snack).

In *DNFCS* and *INRAN-SCAI* the pre-defined meal occasions were: breakfast, morning snack, lunch, afternoon snack, dinner, evening snack. In *FINDIET*, participants reported the meal occasion themselves (breakfast, lunch, supper, dinner, snack, drink, other) and these were then reclassified into the same six groups as in *DNFCS* and *INRAN-SCAI*, including information on the time of consumption for the classification of 'snacks', 'drinks' and 'other' into morning snack, afternoon snack and evening snack. Supper was reclassified as follows: when participants reported lunch, dinner and supper or dinner and supper, supper was reclassified as evening snack. When participants reported breakfast and supper or supper only, supper was reclassified as dinner.

#### ***Socioeconomic, Lifestyle, and Health Factors***

##### ***Education:***

*Newcastle 85+ Study*: Education was self-reported and defined as years spent in full-time education: up to 9 years, 10-11 years, and 12 or more.

The *Life and Living to Advanced Age Cohort Study New Zealand (LiLACS NZ)*: Education was self-reported and defined as low: primary school or no schooling; intermediate: secondary school; high: occupational trade or tertiary.

*National dietary surveys*: Education was defined according to self-reported highest attained education or years of education and categorised into three survey-specific categories. The *Dutch National Food Consumption Survey (DNFCS)*: low: no education, primary or lower vocational education or advanced elementary education; intermediate: intermediate vocational or higher secondary education; high: higher vocational education or university. The *Finnish FINDIET surveys (FINDIET)*: years of education were categorised into low, intermediate and high according to tertiles by sex and birth year. The *third Italian National Food Consumption Survey (INRAN-SCAI)*: low: no title, primary or lower secondary education; intermediate: upper secondary education; high: university degree.

#### *Poverty/household income:*

In the *Newcastle 85+ study*, the Index of Multiple Deprivation (IMD) was used to define level of poverty in current area of residency and was categorised into tertiles (poor areas, intermediate group areas, affluent areas) [2]. The IMD is a composite, weighted measure of multiple deprivations in seven domains (income, employment, health and disability, education, housing and services, living environment, and crime) for small geographic areas of about 1,500 inhabitants [3]. In *LiLACS NZ* a similar measure was used, the NZ deprivation index [4] classified into tertiles (low, mid, high).

Household income was available in *DNFCS* and *FINDIET* only and classified into low, high and unknown. In *DNFCS* household income was considered to be low when net income was <1700 euros per month. In *FINDIET* household income was low when yearly income before tax deduction was < 30.000 euros.

#### *Living arrangements:*

In the *Newcastle 85+ Study* and *LiLACS NZ*, living arrangement was categorised as living alone or not living alone.

In the *national surveys* self-reported information on marital status was used to classify living arrangement into living together (married, cohabiting) and not living together (single, separated or divorced, widow).

#### Lifestyle factors

*Newcastle 85+ Study* and *LiLACS NZ*: Lifestyle factors were self-reported and included current smoking (yes/no) and current alcohol intake (yes/no).

*National dietary surveys*: Smoking was self-reported and classified into never, former or current smokers (*DNFCS* and *FINDIET*) or non-smokers, current smoker (*INRAN-SCAI*). For *INRAN-SCAI* there were a relatively large number of missing values for smoking (and education), therefore, for *INRAN-SCAI* only, these missing values were included as a separate category in the analyses.

BMI was calculated as  $\text{kg/m}^2$ . Body weight and height were measured in the *Newcastle 85+ Study*, *LiLACS NZ*, *DNFCS* and *FINDIET*, but self-reported in *INRAN-SCAI*.

## Results

### Participant characteristics

**Table S1.** Differences in selected characteristics according to physical activity level of community-dwelling older adults in the UK (Newcastle 85+), New Zealand (LiLACS NZ), Netherlands (DNFCS), Finland (FINDIET) and Italy (INRAN-SCAI)

|                                       | Physical activity level |            |              |            | p-value |
|---------------------------------------|-------------------------|------------|--------------|------------|---------|
|                                       | All                     | Low        | Intermediate | High       |         |
| <i>Newcastle 85+</i>                  | N=721                   | N=184      | N=335        | N=202      |         |
| Age (years)                           | 85.5 ± 0.4              | 85.5 ± 0.4 | 85.5 ± 0.4   | 85.5 ± 0.5 | 0.49    |
| Sex (% male, n)                       | 40.1 (289)              | 37.5 (69)  | 32.8 (110)   | 54.5 (110) | <0.0001 |
| Body Mass Index (kg/m <sup>2</sup> )  | 24.5 ± 4.4              | 24.4 ± 4.4 | 24.7 ± 4.5   | 24.2 ± .93 | 0.53    |
| Living alone (% , n)                  | 57.7 (416)              | 58.3 (95)  | 63.0 (208)   | 55.9 (113) | 0.24    |
| Education (≥12 years) (% , n)         | 12.5 (90)               | 10.4 (19)  | 13.3 (27)    | 13.4 (27)  | 0.77    |
| Index of multiple deprivation (% , n) |                         |            |              |            | 0.07    |
| - Poor areas                          | 25.1 (181)              | 20.1 (37)  | 25.4 (85)    | 29.2 (59)  |         |
| - Intermediate                        | 50.6 (365)              | 48.9 (90)  | 53.1 (178)   | 48.0 (97)  |         |
| - Affluent areas                      | 24.3 (175)              | 30.9 (57)  | 21.5 (72)    | 22.8 (46)  |         |
| Smokers (% , n)                       | 5.9 (43)                | 8.7 (16)   | 5.1 (17)     | 5.0 (10)   | 0.19    |
| Alcohol (% , n)                       | 63.5 (458)              | 54.4 (100) | 62.4 (209)   | 73.8 (149) | <0.0001 |
| Adjusted body weight (kg)             | 63.9 ± 8.2              | 62.7 ± 7.5 | 63.3 ± 8.1   | 65.7 ± 8.8 | 0.001   |
| Chronic disease count (≥3) (% , n)    | 39.8 (287)              | 52.2 (96)  | 40.3 (135)   | 27.7 (56)  | 0.0001  |
| Disability (1-6) (% , n)              | 55.6 (401)              | 38.7 (70)  | 70.6 (235)   | 47.5 (96)  | 0.0001  |
| Swallowing problems (% , n)           | 57.8 (416)              | 63.9 (117) | 59.4 (199)   | 49.5 (100) | 0.012   |
| <i>LiLACS NZ Non-Māori</i>            | N=353                   | N=123      | N=120        | N=110      |         |
| Age (years)                           | 85.5 ± 0.5              | 85.7 ± 0.5 | 85.4 ± 0.5   | 85.6 ± 0.5 | 0.005   |
| Sex (% male, n)                       | 47.9 (169)              | 43.9 (54)  | 42.5 (51)    | 58.2 (64)  | 0.033   |
| Body Mass Index (kg/m <sup>2</sup> )  | 26.7 ± 4.1              | 26.7 ± 5.1 | 26.7 ± 3.6   | 26.7 ± 3.4 | 0.75    |
| Living alone (% , n)                  | 50.9 (163)              | 52.5 (53)  | 52.7 (59)    | 47.7 (51)  | 0.71    |
| Education <sup>a</sup> (% , n)        |                         |            |              |            | 0.08    |
| - low                                 | 17.4 (61)               | 17.2 (21)  | 22.9 (27)    | 11.8 (13)  |         |
| - intermediate                        | 55.7 (195)              | 54.9 (67)  | 57.6 (68)    | 54.5 (60)  |         |
| - high                                | 26.7 (94)               | 27.9 (34)  | 19.5 (23)    | 33.6 (37)  |         |
| Index of deprivation (% , n)          |                         |            |              |            | 0.25    |
| - High deprivation                    | 38.8 (137)              | 41.5 (51)  | 40.0 (48)    | 34.5 (38)  |         |
| - Mid                                 | 37.4 (132)              | 30.9 (38)  | 41.7 (50)    | 40.0 (44)  |         |
| - Low deprivation                     | 23.8 (84)               | 27.6 (34)  | 18.3 (22)    | 25.5 (28)  |         |
| Smokers (% , n)                       | 1.7 (6)                 | 3.3 (4)    | 0.8 (1)      | 0.9 (1)    | 0.25    |
| Alcohol (% , n)                       | 70.5 (249)              | 58.5 (72)  | 78.3 (94)    | 75.5 (83)  | 0.01    |
| Adjusted body weight (kg)             | 67.1 ± 8.7              | 65.9 ± 9.2 | 66.8 ± 8.2   | 68.7 ± 8.4 | 0.02    |
| Chronic disease count (≥3) (% , n)    | 64.3 (227)              | 70.7 (87)  | 69.2 (83)    | 51.8 (57)  | 0.02    |
| Disability (1-6) (% , n)              | 69.4 (245)              | 50.0 (61)  | 77.6 (90)    | 90.4 (94)  | <0.01   |
| Swallowing problems (% , n)           | 19.1 (61)               | 25.7 (26)  | 16.1 (18)    | 15.9 (17)  | 0.12    |

| <i>LiLACS NZ</i> Māori               | N=183      | N=58       | N=57        | N=68         |         |
|--------------------------------------|------------|------------|-------------|--------------|---------|
| Age (years)                          | 83.3 ± 2.6 | 83.7 ± 3.0 | 83.3 ± 2.6  | 83.1 ± 2.4   | 0.72    |
| Sex (% male, n)                      | 42.1 (77)  | 36.2 (21)  | 35.1 (20)   | 52.9 (36)    | 0.07    |
| Body Mass Index (kg/m <sup>2</sup> ) | 28.7 ± 5.6 | 30.7 ± 6.7 | 27.7 ± 5.7  | 27.9 ± 4.2   | 0.05    |
| Living alone (% , n)                 | 35.5 (65)  | 45.7 (21)  | 45.8 (22)   | 37.9 (22)    | 0.64    |
| Education <sup>a</sup> (% , n)       |            |            |             |              | 0.24    |
| - low                                | 27.2 (49)  | 36.8 (21)  | 25.0 (14)   | 20.9 (14)    |         |
| - intermediate                       | 60.6(109)  | 56.1 (32)  | 62.5 (35)   | 62.7 (42)    |         |
| - high                               | 12.2 (22)  | 7.0 (4)    | 12.5 (7)    | 16.4 (11)    |         |
| Index of deprivation (% , n)         |            |            |             |              | 0.09    |
| - High deprivation                   | 60.7 (111) | 56.9 (33)  | 64.9 (37)   | 60.3 (41)    |         |
| - Mid                                | 25.1 (46)  | 31.0 (18)  | 28.1 (16)   | 17.6 (12)    |         |
| - Low deprivation                    | 14.2 (26)  | 12.1 (7)   | 7.0 (4)     | 22.1 (15)    |         |
| Smokers (% , n)                      | 7.1 (13)   | 3.4 (2)    | 12.3 (7)    | 5.9 (4)      | 0.16    |
| Alcohol (% , n)                      | 54.4 (99)  | 38.6 (22)  | 66.7 (38)   | 57.4 (39)    | 0.01    |
| Adjusted body weight (kg)            | 65.9 ± 8.0 | 65.4 ± 6.4 | 64.0 ± 7.7  | 67.9 ± 8.8   | 0.05    |
| Chronic disease count (≥3) (% , n)   | 56.3 (103) | 69.0 (40)  | 52.6 (30)   | 48.5 (33)    | 0.02    |
| Disability (1-6) (% , n)             | 68.9 (124) | 39.7 (23)  | 76.4 (42)   | 88.1 (59)    | <0.01   |
| Swallowing problems (% , n)          | 16.7 (25)  | 20 (9)     | 18.8 (9)    | 12.3 (7)     | 0.522   |
| <i>DNFCS</i>                         | N=738      | N=32       | N=126       | N=580        |         |
| Age (years)                          | 77.1 ± 5.2 | 81.5 ± 6.4 | 77.4 ± 5.3* | 76.8 ± 5.1*  | <0.0001 |
| Sex (% male, n)                      | 50.5 (373) | 50.0 (16)  | 57.9 (73)   | 49.0 (284)   | 0.19    |
| Body Mass Index (kg/m <sup>2</sup> ) | 27.4 ± 3.8 | 29.8 ± 6.4 | 27.8 ± 3.8  | 27.2 ± 3.6*  | 0.0033  |
| Married/living together (%)          | 61.5 (454) | 53.1 (17)  | 61.9 (126)  | 61.9 (359)   | 0.61    |
| Education <sup>a</sup> (%)           |            |            |             |              | 0.95    |
| - Low                                | 55.5 (408) | 62.5 (20)  | 54.8 (69)   | 55.3 (319)   |         |
| - Intermediate                       | 21.9 (161) | 18.8 (6)   | 22.2 (28)   | 22.0 (127)   |         |
| - High                               | 22.6 (166) | 18.8 (6)   | 23.0 (29)   | 22.7 (131)   |         |
| Household income (% , n)             |            |            |             |              | 0.33    |
| - Low                                | 35.8 (264) | 50.0 (16)  | 31.0 (39)   | 36.0 (209)   |         |
| - High                               | 36.9 (272) | 25.0 (8)   | 41.3 (52)   | 36.6 (212)   |         |
| - Unknown                            | 27.4 (202) | 25.0 (8)   | 27.8 (35)   | 27.4 (159)   |         |
| Smoking (% , n)                      |            |            |             |              | 0.0065  |
| - Never                              | 34.3 (253) | 28.1 (9)   | 20.6 (26)   | 37.6 (218)   |         |
| - Former                             | 55.4 (409) | 62.5 (20)  | 68.3 (86)   | 52.2 (303)   |         |
| - Current                            | 10.3 (76)  | 9.4 (3)    | 11.1 (14)   | 10.2 (59)    |         |
| <i>FINDIET</i>                       | N=867      | N=143      | N=544       | N=180        |         |
| Age (years)                          | 68.8 ± 2.8 | 69.4 ± 2.8 | 68.8 ± 2.8  | 68.4 ± 2.7*  | 0.0033  |
| Sex (% male, n)                      | 50.5 (438) | 46.2 (66)  | 50.2 (273)  | 55.0 (99)    | 0.28    |
| Body Mass Index (kg/m <sup>2</sup> ) | 28.2 ± 4.7 | 30.4 ± 5.8 | 28.1 ± 4.1* | 26.8 ± 3.7*^ | <0.0001 |
| Married/living together (%)          | 71.8 (622) | 67.8 (97)  | 71.1 (386)  | 77.2 (139)   | 0.14    |
| Education <sup>a</sup> (%)           |            |            |             |              | 0.012   |
| - Low                                | 30.8 (261) | 38.0 (52)  | 31.5 (167)  | 23.5 (42)    |         |
| - Intermediate                       | 35.3 (299) | 32.9 (45)  | 36.7 (195)  | 33.0 (59)    |         |
| - High                               | 33.9 (287) | 29.2 (40)  | 31.8 (169)  | 43.6 (78)    |         |
| Household income (% , n)             |            |            |             |              | 0.0011  |
| - Low                                | 53.6 (465) | 62.2 (89)  | 54.2 (295)  | 45.0 (81)    |         |
| - High                               | 40.8 (354) | 30.1 (43)  | 39.9 (217)  | 52.2 (94)    |         |
| - Unknown                            | 5.5 (48)   | 7.7 (11)   | 5.9 (32)    | 2.8 (5)      |         |

|                                      |              |             |              |              |        |
|--------------------------------------|--------------|-------------|--------------|--------------|--------|
| Smoking (% , n)                      |              |             |              |              | 0.011  |
| - No                                 | 58.2 (496)   | 51.8 (73)   | 58.7 (314)   | 61.6 (109)   |        |
| - Former                             | 31.8 (271)   | 32.6 (46)   | 30.7 (164)   | 34.5 (61)    |        |
| - Current                            | 10.1 (86)    | 15.6 (22)   | 10.7 (57)    | 4.0 (7)      |        |
| <b>INRAN-SCAI</b>                    | <b>N=510</b> | <b>N=67</b> | <b>N=214</b> | <b>N=229</b> |        |
| Age (years)                          | 74.5 ± 7.3   | 76.5 ± 8.2  | 75.0 ± 7.8   | 73.6 ± 6.4*  | 0.0076 |
| Sex (% male, n)                      | 39.6 (202)   | 50.8 (34)   | 44.9 (96)    | 31.4 (72)    | 0.0021 |
| Body Mass Index (kg/m <sup>2</sup> ) | 25.7 ± 4.1   | 27.0 ± 5.8  | 25.4 ± 3.5*  | 25.7 ± 3.9   | 0.0195 |
| Married/living together (%)          | 50.8 (259)   | 49.3 (33)   | 53.3 (114)   | 48.9 (112)   | 0.85   |
| Education <sup>a</sup> (%)           |              |             |              |              |        |
| - Low                                | 71.0 (362)   | 67.2 (45)   | 69.6 (149)   | 73.4 (168)   | 0.057  |
| - Intermediate                       | 15.1 (77)    | 10.5 (7)    | 14.0 (30)    | 17.5 (40)    |        |
| - High                               | 8.8 (45)     | 13.4 (9)    | 9.4 (20)     | 7.0 (16)     |        |
| - Unknown                            | 5.1 (26)     | 9.0 (6)     | 7.0 (15)     | 2.2 (5)      |        |
| Household income (% , n)             | N/A          | N/A         | N/A          | N/A          | -      |
| Smoking (% , n)                      |              |             |              |              |        |
| - No                                 | 85.9 (438)   | 77.6 (52)   | 84.6 (181)   | 89.5 (205)   | 0.0229 |
| - Current                            | 10.8 (55)    | 13.4 (9)    | 11.7 (25)    | 9.2 (21)     |        |
| - Unknown                            | 3.3 (17)     | 9.0 (6)     | 3.7 (8)      | 1.3 (3)      |        |

Presented as mean ± standard deviation for continuous variables and % (n) for categorical variables. \* Differs from those with a low physical activity level  $p < 0.05$ . ^ Differs from those with an intermediate physical activity level. <sup>a</sup>: LiLACS NZ: low: no schooling or primary; intermediate: secondary; high: occupational trade or tertiary. DNFCs: low: no education, primary or lower vocational education or advanced elementary education; intermediate: intermediate vocational or higher secondary education; high: higher vocational education or university. FINDIET: years of education were categorised into low, intermediate and high according to tertiles by age and birth year. INRAN-SCAI: low: no title, primary or lower secondary education; intermediate: upper secondary education; high: university degree.

**Table S2.** Differences in selected characteristics according to sedentary behaviour of community-dwelling older adults in Finland (FINDIET) and Italy (INRAN-SCAI)

|                                      | Sedentary behaviour |              |              | p-value |
|--------------------------------------|---------------------|--------------|--------------|---------|
|                                      | <4 hrs/day          | 4-6 hrs/day  | >6 hrs/day   |         |
| <b>FINDIET (n=798)</b>               | <b>N=261</b>        | <b>N=360</b> | <b>N=177</b> |         |
| Age (years)                          | 68.9 ± 2.8          | 68.9 ± 2.8   | 68.4 ± 2.8   | 0.15    |
| Body Mass Index (kg/m <sup>2</sup> ) | 27.9 ± 4.3          | 28.0 ± 4.3   | 28.5 ± 4.7   | 0.28    |
| Sex (% male, n)                      | 42.5 (111)          | 53.1 (191)   | 58.2 (103)   | 0.0028  |
| Married/living together (% , n)      | 69.7 (182)          | 75.8 (272)   | 71.2 (126)   | 0.22    |
| Education (% , n)                    |                     |              |              |         |
| Low                                  | 32.8 (84)           | 29.3 (103)   | 25.4 (45)    | 0.0007  |
| Intermediate                         | 35.9 (92)           | 39.0 (137)   | 26.0 (46)    |         |
| High                                 | 31.3 (80)           | 31.6 (111)   | 48.6 (86)    |         |
| Household income (% , n)             |                     |              |              |         |
| Low                                  | 62.3 (163)          | 51.9 (187)   | 44.6 (79)    | 0.0005  |
| High                                 | 32.6 (85)           | 44.7 (161)   | 53.1 (94)    |         |
| Unknown                              | 5.0 (13)            | 3.3 (12)     | 2.3 (4)      |         |
| Smoking (% , n)                      |                     |              |              |         |
| No                                   | 67.8 (173)          | 55.3 (197)   | 48.9 (86)    | 0.0012  |
| Former                               | 23.5 (60)           | 33.7 (120)   | 40.3 (71)    |         |
| Current                              | 8.6 (22)            | 11.0 (39)    | 10.8 (19)    |         |
| <b>INRAN-SCAI (n=493)</b>            | <b>N=81</b>         | <b>N=152</b> | <b>N=260</b> |         |
| Age (years)                          | 78.3 ± 7.7          | 75.1 ± 7.3*  | 72.8 ± 6.5*^ | <0.0001 |
| Body Mass Index (kg/m <sup>2</sup> ) | 25.9 ± 4.9          | 25.8 ± 3.7   | 25.6 ± 4.1   | 0.82    |
| Sex (% male, n)                      | 35.8 (29)           | 38.8 (59)    | 41.5 (108)   | 0.63    |
| Married/living together (% , n)      | 30.9 (25)           | 54.0 (82)    | 55.8 (144)   | 0.0003  |
| Education (% , n)                    |                     |              |              |         |
| Low                                  | 75.3 (61)           | 70.2 (106)   | 77.4 (195)   | 0.51    |
| Intermediate                         | 17.3 (14)           | 19.2 (29)    | 13.5 (34)    |         |
| High                                 | 7.4 (6)             | 10.6 (16)    | 9.1 (23)     |         |
| Household income (% , n)             | N/A                 | N/A          | N/A          | -       |
| Smoking (% , n)                      |                     |              |              |         |
| No                                   | 92.6 (75)           | 92.1 (139)   | 85.7 (222)   | 0.072   |
| Current                              | 7.4 (6)             | 8.0 (12)     | 14.3 (37)    |         |

Presented as mean ± standard deviation for continuous variables and % (n) for categorical variables. \* Differs from those with <4 hrs sedentary behaviour per day p<0.05. ^ Differs from those with 4-6 hrs sedentary behaviour per day.

**Table S3.** Energy and protein intake according to physical activity tertile in community-dwelling older adults from the Newcastle 85+ Study, LiLACS NZ, and national surveys (adjusted for age and sex)

|                                                      | Physical activity level |               |               |               | p-value |
|------------------------------------------------------|-------------------------|---------------|---------------|---------------|---------|
|                                                      | All                     | Low           | Intermediate  | High          |         |
| <i>Newcastle 85+ Study</i>                           | N=721                   | N= 184        | N= 335        | N= 202        |         |
| Energy intake (kcal/day)                             | 1613.0 ± 18.8           | 1617.6 ± 37.5 | 1625.6 ± 24.9 | 1838.0 ± 38.5 | 0.0001  |
| Protein intake                                       |                         |               |               |               |         |
| - grams/day                                          | 64.3 ± 0.8              | 59.7 ± 1.5    | 62.6 ± 1.1    | 71.2 ± 1.8    | 0.0001  |
| - g/kg/ aBW/day                                      | 1.00 ± 0.01             | 0.95 ± 0.02   | 0.99 ± 0.02   | 1.09 ± 0.03   | 0.0013  |
| - g/day main meals only                              | 42.4 ± 0.8              | 37.4 ± 1.5    | 42.1 ± 1.1    | 47.4 ± 1.8    | 0.0003  |
| - g/day breakfast                                    | 7.5 ± 0.3               | 6.9 ± 0.02    | 7.1 ± 0.3     | 8.6 ± 0.5     | 0.15    |
| Low protein (<0.8 g/kg aBW/day) (% , n)              | 27.6 (199)              | 32.1 (59)     | 27.8 (93)     | 23.3 (47)     | 0.15    |
| <i>LiLACS NZ Non-Māori</i>                           | N=353                   | N=123         | N=120         | N=110         |         |
| Energy intake (kcal/day)                             | 1765.1 ± 29.5           | 1679.7 ± 52.5 | 1761.7 ± 49.1 | 1864.3 ± 50.3 | 0.012   |
| Protein intake                                       |                         |               |               |               |         |
| - grams/day                                          | 71.3 ± 1.3              | 68.8 ± 2.4    | 69.5 ± 1.9    | 76.0 ± 2.2    | 0.010   |
| - g/kg/ aBW/day                                      | 1.1 ± 0.02              | 1.0 ± 0.03    | 1.0 ± 0.03    | 1.1 ± 0.03    | 0.047   |
| - g/day main meals only                              | 57.0 ± 1.2              | 53.4 ± 2.1    | 56.1 ± 1.9    | 62.0 ± 1.9    | 0.003   |
| - g/day breakfast                                    | 10.8 ± 0.3              | 10.2 ± 0.56   | 10.7 ± 0.61   | 11.5 ± 0.63   | 0.29    |
| Low protein (<0.8 g/kg aBW/day) (% , n)              | 19.7 (67)               | 23.0 (26)     | 18.8 (22)     | 17.3 (19)     | 0.54    |
| <i>LiLACS NZ Māori</i>                               | N=183                   | N=58          | N=57          | N=68          |         |
| Energy intake (kcal/day)                             | 1667.9 ± 44.4           | 1566.1 ± 49.3 | 1544 ± 43.0   | 1858.6 ± 66.3 | 0.027   |
| Protein intake                                       |                         |               |               |               |         |
| - grams/day                                          | 74.8 ± 2.5              | 68.0 ± 3.8    | 70.3 ± 3.9    | 84.4 ± 4.9    | 0.047   |
| - g/kg/ aBW/day                                      | 1.1 ± 0.04              | 1.1 ± 0.07    | 1.1 ± 0.07    | 1.2 ± 0.08    | 0.34    |
| - g/day main meals only                              | 56.3 ± 2.2              | 48.4 ± 2.8    | 51.6 ± 3.2    | 67.0 ± 4.6    | 0.005   |
| - g/day breakfast                                    | 10.8 ± 0.9              | 9.3 ± 0.9     | 9.2 ± 0.9     | 13.3 ± 2.0    | 0.07    |
| Low protein (<0.8 g/kg aBW/day) (% , n)              | 24.7 (39)               | 28.9 (13)     | 26.9 (14)     | 19.7 (12)     | 0.050   |
| <i>DNFCS*</i>                                        | N=1476                  | N=64          | N=252         | N=1160        |         |
| Energy intake (kcal/day)                             | 1974 ± 17.4             | 1763 ± 75     | 1937 ± 38     | 1991 ± 17     | 0.0083  |
| Protein intake                                       |                         |               |               |               |         |
| - grams/day                                          | 76.3 ± 0.7              | 68.8 ± 3.3    | 75.2 ± 1.6    | 76.9 ± 0.8    | 0.045   |
| - g/kg/ aBW/day <sup>†</sup>                         | 1.05 ± 0.01             | 0.93 ± 0.05   | 1.04 ± 0.02   | 1.06 ± 0.01   | 0.028   |
| - g/day main meals only                              | 65.1 ± 0.7              | 58.3 ± 3.1    | 64.1 ± 1.5    | 65.7 ± 0.7    | 0.055   |
| - g/day breakfast                                    | 11.5 ± 0.2              | 11.0 ± 1.1    | 11.9 ± 0.6    | 11.4 ± 0.3    | 0.63    |
| Low protein (<0.8 g/kg aBW/day) (% , n) <sup>†</sup> | 20.0 (290)              | 35.7 (19)     | 19.7 (49)     | 19.3 (222)    | 0.033   |
| <i>FINDIET*</i>                                      | N=1734                  | N=286         | N=1088        | N=360         |         |

**Table S3.** Energy and protein intake according to physical activity tertile in community-dwelling older adults from the Newcastle 85+ Study, LiLACS NZ, and national surveys (adjusted for age and sex)

|                                         | Physical activity level |             |              |             | p-value |
|-----------------------------------------|-------------------------|-------------|--------------|-------------|---------|
|                                         | All                     | Low         | Intermediate | High        |         |
| Energy intake (kcal/day)                | 1653 ± 18.9             | 1631 ± 43   | 1642 ± 22    | 1691 ± 38   | 0.48    |
| Protein intake                          |                         |             |              |             |         |
| - grams/day                             | 70.2 ± 0.8              | 68.4 ± 1.9  | 69.5 ± 1.0   | 73.4 ± 1.7  | 0.091   |
| - g/kg/ aBW/day                         | 1.01 ± 0.01             | 0.98 ± 0.03 | 1.01 ± 0.01  | 1.06 ± 0.02 | 0.058   |
| - g/day main meals only                 | 55.1 ± 0.7              | 53.5 ± 1.7  | 54.7 ± 0.9   | 57.5 ± 1.6  | 0.18    |
| - g/day breakfast                       | 12.6 ± 0.3              | 11.8 ± 0.7  | 12.6 ± 0.4   | 13.4 ± 0.6  | 0.23    |
| Low protein (<0.8 g/kg aBW/day) (% , n) | 30.6 (530)              | 35.9 (103)  | 31.4 (341)   | 24.1 (87)   | 0.018   |
| INRAN-SCAI*                             | N=1530                  | N=201       | N=642        | N=687       |         |
| Energy intake (kcal/day)                | 2022 ± 25               | 1995 ± 63   | 2019 ± 35    | 2141 ± 35   | 0.023   |
| Protein intake                          |                         |             |              |             |         |
| - grams/day                             | 78.2 ± 0.9              | 79.5 ± 2.4  | 79.0 ± 1.3   | 80.8 ± 1.4  | 0.63    |
| - g/kg/ aBW/day                         | 1.17 ± 0.01             | 1.16 ± 0.04 | 1.16 ± 0.02  | 1.19 ± 0.02 | 0.50    |
| - g/day main meals only                 | 75.3 ± 0.9              | 76.8 ± 2.3  | 76.0 ± 1.3   | 77.8 ± 1.3  | 0.60    |
| - g/day breakfast                       | 7.1 ± 0.2               | 6.3 ± 0.6   | 6.5 ± 0.3    | 8.1 ± 0.3   | 0.001   |
| Low protein (<0.8 g/kg aBW/day) (% , n) | 15.4 (235)              | 15.0 (30)   | 16.4 (105)   | 13.1 (90)   | 0.43    |

Presented as mean ± standard error for continuous variables and % (n) for categorical variables. Kruskal-Wallis test for non-normally distributed continuous variables. \* Days are used as the unit of analyses; sample size based on number of recall days per survey for participants with non-missing physical activity data. † n=24 missing in DNFCs.

## Physical activity and protein intake

**Table S4.** Protein intake according to physical activity in community-dwelling older adults from the Netherlands (DNFCS), Finland (FINDIET) and Italy (INRAN-SCAI)

|                               | Physical activity level |              |             | p-value |
|-------------------------------|-------------------------|--------------|-------------|---------|
|                               | Low                     | Intermediate | High        |         |
| DNFCS (n=1476 days)           |                         |              |             |         |
| Protein intake (grams/day)    |                         |              |             |         |
| Model 1                       | 68.8 ± 3.3              | 75.2 ± 1.6   | 76.9 ± 0.8  | 0.045   |
| Model 2                       | 68.7 ± 3.3              | 75.1 ± 1.8   | 76.5 ± 1.0  | 0.055   |
| Model 3                       | 73.8 ± 2.5              | 75.3 ± 1.3   | 75.2 ± 0.7  | 0.84    |
| Exclusion special days        | 75.4 ± 2.5              | 75.7 ± 1.3   | 75.5 ± 0.7  | 0.98    |
| Exclusion special diets       | 72.9 ± 2.7              | 75.2 ± 1.5   | 75.6 ± 0.8  | 0.61    |
| Protein intake (g/kg aBW/day) |                         |              |             |         |
| Model 1                       | 0.93 ± 0.05             | 1.04 ± 0.02  | 1.06 ± 0.01 | 0.028   |
| Model 2                       | 0.94 ± 0.05             | 1.05 ± 0.03  | 1.07 ± 0.01 | 0.044   |
| Model 3                       | 1.04 ± 0.04             | 1.05 ± 0.02  | 1.05 ± 0.01 | 0.93    |
| Exclusion special days        | 1.05 ± 0.04             | 1.06 ± 0.02  | 1.05 ± 0.01 | 0.96    |
| Exclusion special diets       | 1.01 ± 0.05             | 1.05 ± 0.02  | 1.05 ± 0.01 | 0.67    |
| FINDIET (n=1734 days)         |                         |              |             |         |
| Protein intake (grams/day)    |                         |              |             |         |
| Model 1                       | 68.4 ± 1.9              | 69.5 ± 1.0   | 73.4 ± 1.7  | 0.091   |
| Model 2                       | 67.5 ± 2.4              | 68.2± 1.7    | 72.5 ± 2.3  | 0.085   |
| Model 3                       | 68.7 ± 1.5              | 69.2 ± 1.1   | 71.1 ± 1.5  | 0.29    |
| Exclusion special days        | 68.6 ± 1.5              | 69.2 ± 1.1   | 70.9 ± 1.5  | 0.34    |
| Protein intake (g/kg aBW/day) |                         |              |             |         |
| Model 1                       | 0.98 ± 0.03             | 1.01 ± 0.01  | 1.06 ± 0.02 | 0.058   |
| Model 2                       | 0.97 ± 0.03             | 0.99 ± 0.02  | 1.06 ± 0.03 | 0.039   |
| Model 3                       | 0.98 ± 0.02             | 1.01 ± 0.02  | 1.04 ± 0.02 | 0.11    |
| Exclusion special days        | 0.98 ± 0.02             | 1.00 ± 0.02  | 1.03 ± 0.02 | 0.12    |
| INRAN-SCAI (n=1530 days)      |                         |              |             |         |
| Protein intake (grams/day)    |                         |              |             |         |
| Model 1                       | 79.5 ± 2.4              | 79.0 ± 1.3   | 80.8 ± 1.4  | 0.63    |
| Model 2                       | 79.1 ± 3.3              | 77.8 ± 2.7   | 79.3 ± 2.8  | 0.73    |
| Model 3                       | 79.0 ± 1.6              | 77.5 ± 1.4   | 75.1 ± 1.4  | 0.0061  |
| Exclusion special days        | 80.4 ± 1.7              | 78.1 ± 1.4   | 76.3 ± 1.4  | 0.017   |
| Exclusion special diets       | 79.7 ± 1.7              | 78.2 ± 1.3   | 76.0 ± 1.4  | 0.014   |
| Protein intake (g/kg aBW/day) |                         |              |             |         |
| Model 1                       | 1.16 ± 0.04             | 1.16 ± 0.02  | 1.19 ± 0.02 | 0.50    |
| Model 2                       | 1.16 ± 0.05             | 1.15 ± 0.04  | 1.18 ± 0.04 | 0.70    |
| Model 3                       | 1.16 ± 0.03             | 1.15 ± 0.03  | 1.12 ± 0.03 | 0.13    |
| Exclusion special days        | 1.19 ± 0.03             | 1.16 ± 0.03  | 1.14 ± 0.03 | 0.15    |
| Exclusion special diets       | 1.18 ± 0.03             | 1.16 ± 0.03  | 1.13 ± 0.03 | 0.15    |

Presented as mean ± standard error. Repeated measures ANOVA, including an unstructured covariance matrix to account for within-person correlation, was used to compare differences according to physical activity level. Model 1: adjusted for age and sex. Model 2: adjusted for age, sex, educational level, marital status, and smoking. Model 3: Model 2 additionally adjusted for energy intake.

**Table S5.** Odds ratios (OR) and 95% CI for the association between physical activity tertiles and protein status (adequate vs. low protein\*) in the Newcastle 85+ Study and LiLACS NZ

|                            | Physical activity level |              |                  |
|----------------------------|-------------------------|--------------|------------------|
|                            | Low                     | Intermediate | High             |
| <i>Newcastle 85+ Study</i> |                         |              |                  |
| OR (95% CI)                |                         |              |                  |
| Model 1                    | 1.25 (0.85-1.86)        | 1.0 (Ref)    | 0.86 (0.57-1.30) |
| Model 2                    | 1.28 (0.85-1.94)        | 1.0 (Ref)    | 0.82 (0.54-1.24) |
| Model 3                    | 1.03 (0.61-1.74)        | 1.0 (Ref)    | 1.07 (0.65-1.78) |
| Model 4                    | 1.09 (0.61-1.95)        | 1.0 (Ref)    | 1.11 (0.65-1.91) |
| <i>LiLACS NZ Non-Māori</i> |                         |              |                  |
| OR (95% CI)                |                         |              |                  |
| Model 1                    | 1.16 (0.60-2.22)        | 1.0 (Ref)    | 0.89 (0.45-1.77) |
| Model 2                    | 1.14 (0.55-2.37)        | 1.0 (Ref)    | 0.89 (0.42-1.86) |
| Model 3                    | 1.05 (0.46-2.40)        | 1.0 (Ref)    | 1.21 (0.51-2.84) |
| Model 4                    | 1.45 (0.57-3.72)        | 1.0 (Ref)    | 1.30 (0.51-3.29) |
| <i>LiLACS NZ Māori</i>     |                         |              |                  |
| OR (95% CI)                |                         |              |                  |
| Model 1                    | 1.07 (0.44-2.62)        | 1.0 (Ref)    | 0.75 (0.30-1.83) |
| Model 2                    | 0.89 (0.30-2.63)        | 1.0 (Ref)    | 0.79 (0.28-2.20) |
| Model 3                    | 1.04 (0.28-3.83)        | 1.0 (Ref)    | 1.31 (0.39-4.34) |
| Model 4                    | 0.97 (0.24-4.00)        | 1.0 (Ref)    | 1.34 (0.34-5.29) |

\*low protein: <0.8 g/kg aBW/d, adequate protein: ≥0.8 g/kg aBW/d.

Model 1 included protein intake, sex and age (LiLACS NZ); model 2 was also adjusted for living alone, education, deprivation, smoking, and alcohol; model 3 was further adjusted for energy intake; model 4 was further adjusted for disease count, disability and swallowing problems

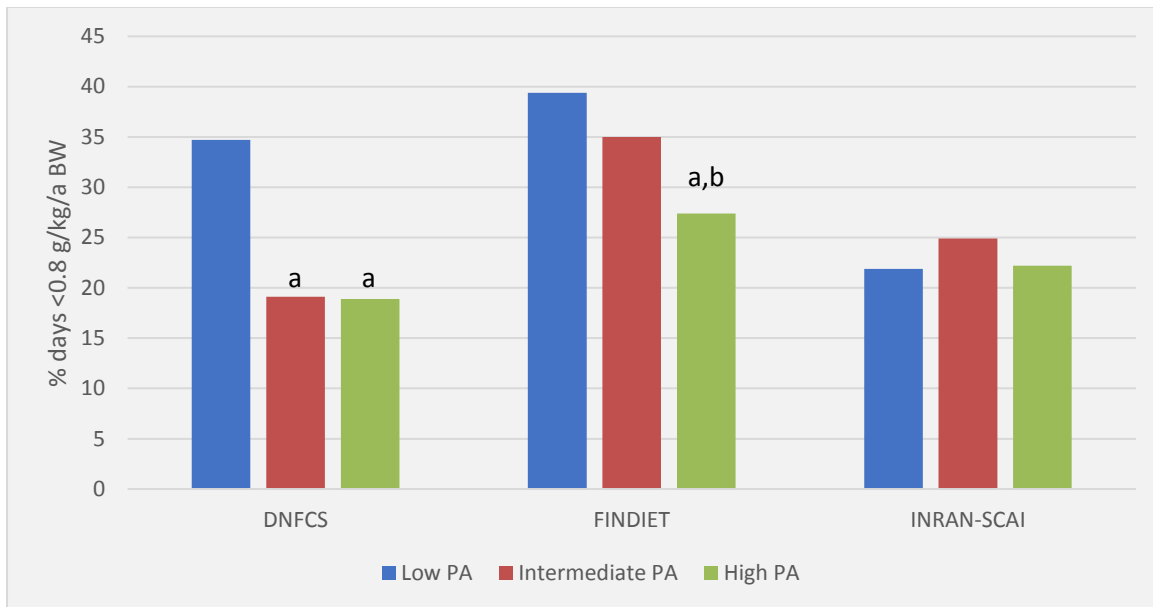

**Figure S1.** Percentage of days on which protein intake was below the recommended amount of 0.8 g/kg aBW according to physical activity level in older adults from the Netherlands (DNFCS n=1476), Finland (FINDIET n=1734) and Italy (INRAN-SCAI n=1530). Adjusted for age, sex, marital status, education, (household income) and smoking. <sup>a</sup> Differs from those with a low physical activity level  $p < 0.05$ . <sup>b</sup> Differs from those with an intermediate physical activity level  $p < 0.05$ .

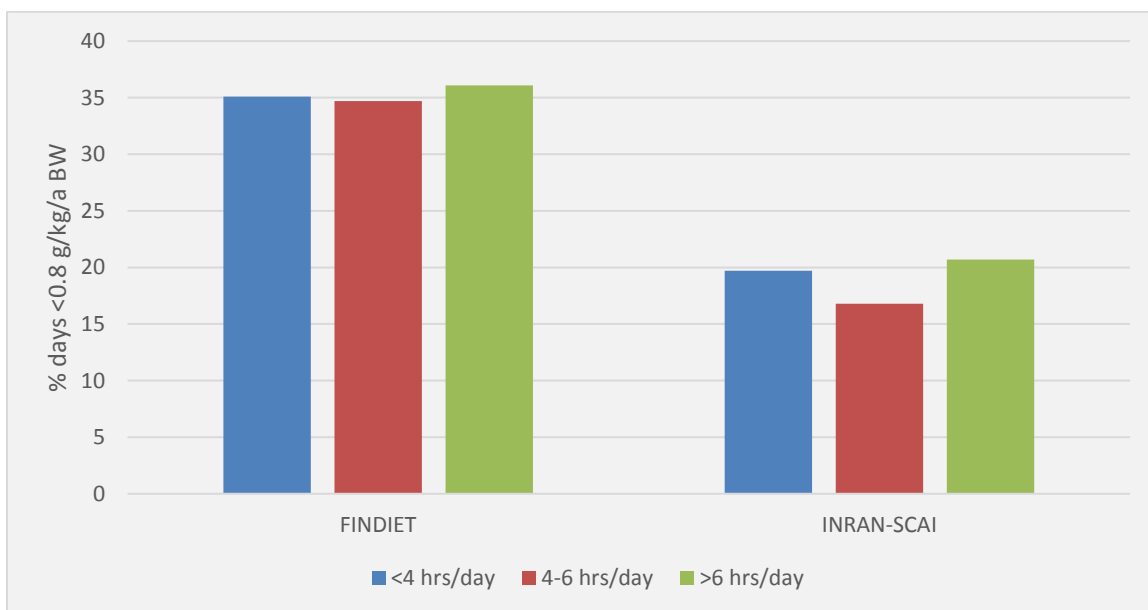

**Figure S2.** Percentage of days on which protein intake was below the recommended amount of 0.8 g/kg aBW according to level of sedentary behaviour in older adults from Finland (FINDIET n=1446) and Italy (INRAN-SCAI n=1479). Adjusted for age, sex, marital status, education, (household income) and smoking.

**Table S6.** Protein intake according to sedentary behaviour in community-dwelling older adults from Finland (FINDIET) and Italy (INRAN-SCAI)

|                               |             | Sedentary behaviour |             |             | p-value |
|-------------------------------|-------------|---------------------|-------------|-------------|---------|
|                               | All         | <4 hrs/day          | 4-6 hrs/day | >6 hrs/day  |         |
| <i>FINDIET</i> (n=1596)*      |             | N=522               | N=720       | N=354       |         |
| Protein intake (grams/day)    | 70.5 ± 0.9  |                     |             |             |         |
| Model 1                       |             | 69.7 ± 1.4          | 70.7 ± 1.2  | 70.4 ± 1.7  | 0.86    |
| Model 2                       |             | 67.9 ± 2.2          | 68.7 ± 2.1  | 68.5 ± 2.4  | 0.92    |
| Model 3                       |             | 68.6 ± 1.4          | 68.9 ± 1.3  | 68.9 ± 1.5  | 0.97    |
| Exclusion special days        | 70.5 ± 0.9  | 68.6 ± 1.4          | 68.6 ± 1.4  | 68.9 ± 1.6  | 0.98    |
| Exclusion special diets       | N/A         | N/A                 | N/A         | N/A         |         |
| Protein intake (g/kg aBW/day) | 1.02 ± 0.01 |                     |             |             |         |
| Model 1                       |             | 1.02 ± 0.02         | 1.02 ± 0.02 | 1.00 ± 0.03 | 0.82    |
| Model 2                       |             | 1.00 ± 0.03         | 1.00 ± 0.03 | 0.98 ± 0.03 | 0.88    |
| Model 3                       |             | 1.01 ± 0.02         | 1.00 ± 0.02 | 0.99 ± 0.02 | 0.77    |
| Exclusion special days        | 1.02 ± 0.01 | 1.00 ± 0.02         | 1.00 ± 0.02 | 0.99 ± 0.02 | 0.75    |
| Exclusion special diets       | N/A         | N/A                 | N/A         | N/A         |         |
| <i>INRAN-SCAI</i> (n=1479)*   |             | N=243               | N=456       | N=780       |         |
| Protein intake (grams/day)    | 78.1 ± 1.0  |                     |             |             |         |
| Model 1                       |             | 76.8 ± 2.2          | 81.2 ± 1.6  | 79.9 ± 1.2  | 0.28    |
| Model 2                       |             | 74.7 ± 2.6          | 79.2 ± 2.1  | 77.7 ± 1.8  | 0.24    |
| Model 3                       |             | 75.1 ± 1.3          | 76.8 ± 1.0  | 77.2 ± 0.9  | 0.24    |
| Exclusion special days        | 78.8 ± 1.0  | 77.0 ± 1.4          | 77.7 ± 1.1  | 78.0 ± 1.0  | 0.77    |
| Exclusion special diets       | 78.9 ± 1.0  | 75.9 ± 1.3          | 77.4 ± 1.1  | 78.1 ± 0.9  | 0.26    |
| Protein intake (g/kg aBW/day) | 1.17 ± 0.01 |                     |             |             |         |
| Model 1                       |             | 1.15 ± 0.03         | 1.19 ± 0.02 | 1.17 ± 0.02 | 0.59    |
| Model 2                       |             | 1.12 ± 0.04         | 1.16 ± 0.03 | 1.14 ± 0.03 | 0.55    |
| Model 3                       |             | 1.12 ± 0.02         | 1.13 ± 0.02 | 1.13 ± 0.02 | 0.93    |
| Exclusion special days        | 1.18 ± 0.01 | 1.15 ± 0.03         | 1.14 ± 0.02 | 1.15 ± 0.02 | 0.92    |
| Exclusion special diets       | 1.18 ± 0.01 | 1.14 ± 0.03         | 1.13 ± 0.02 | 1.14 ± 0.02 | 0.91    |

\*Days are used as the unit of analyses. Model 1: adjusted for age and sex. Model 2: adjusted for age, sex, educational level, marital status, household income (except for INRAN-SCAI) and smoking. Model 3: Model 2 additionally adjusted for energy intake. N/A: not available.

## Physical activity and number of eating occasions providing protein

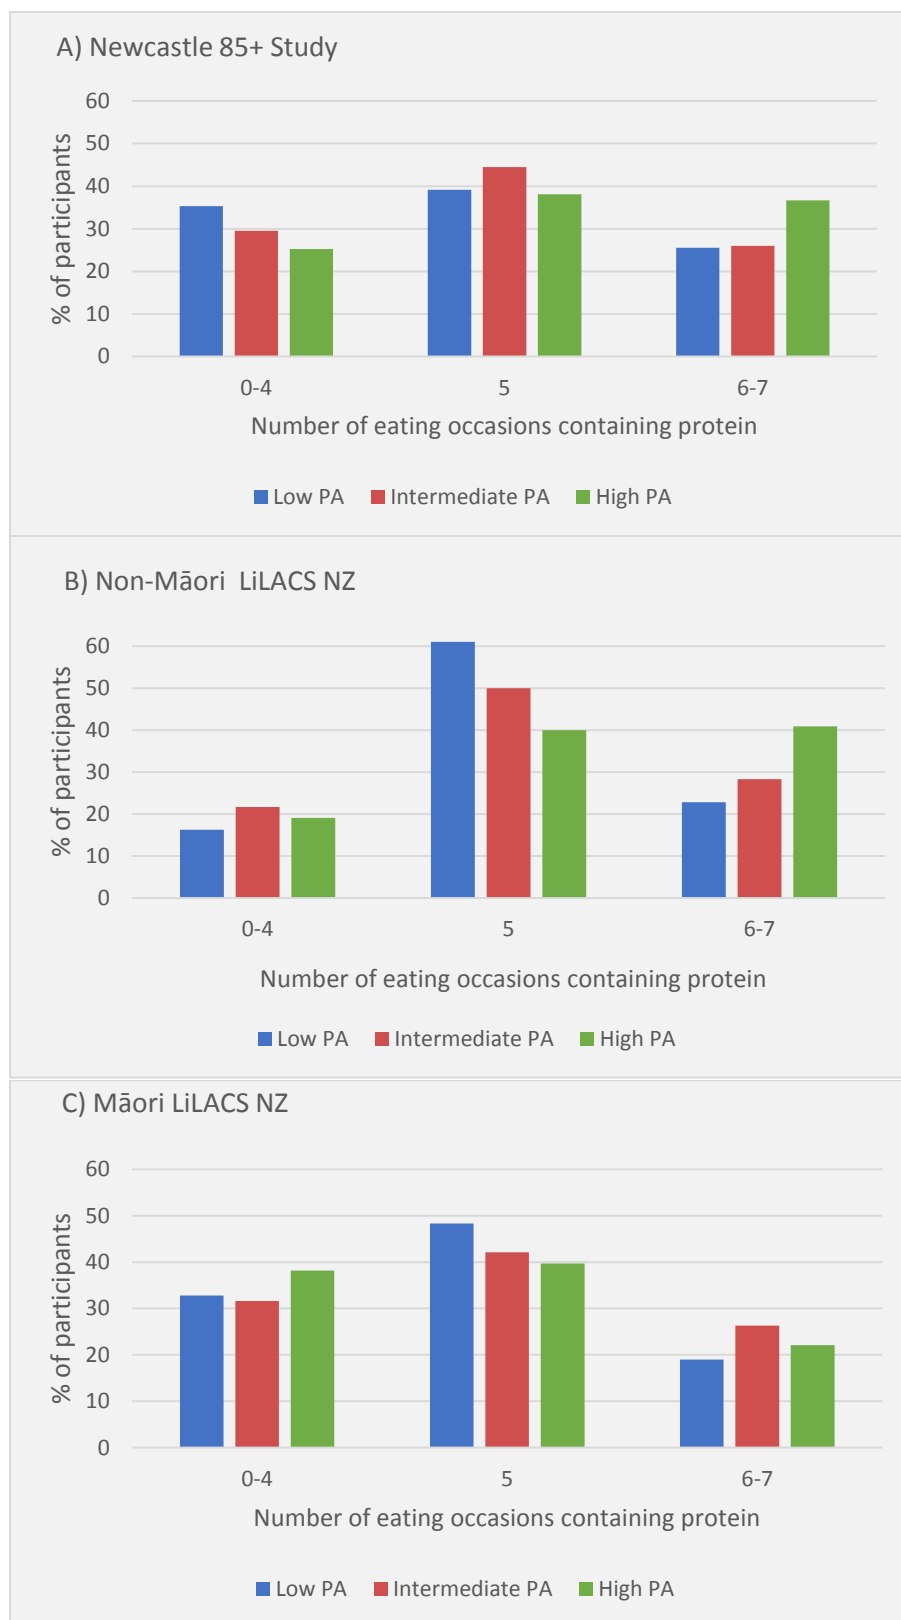

**Figure S3.** Percentage of participants in categories of eating occasions according to physical activity tertile in older adults of the A) Newcastle 85+ Study, B) Non-Māori, and C) Māori participants in the LiLACS NZ Study.

**Table S7.** Number of eating occasions providing protein according to sedentary behaviour in community-dwelling older adults from Finland (FINDIET) and Italy (INRAN-SCAI)

| Sedentary behaviour        |            |            |             |            |         |
|----------------------------|------------|------------|-------------|------------|---------|
|                            | All        | <4 hrs/day | 4-6 hrs/day | >6 hrs/day | p-value |
| FINDIET (n=1596)           |            |            |             |            |         |
| Number of eating occasions | 4.5 (0.03) |            |             |            |         |
| Model 1                    |            | 4.6 (0.05) | 4.5 (0.04)  | 4.5 (0.05) | 0.90    |
| Model 2                    |            | 4.4 (0.07) | 4.4 (0.06)  | 4.4 (0.07) | 0.94    |
| Model 3                    |            | 4.4 (0.07) | 4.4 (0.06)  | 4.4 (0.07) | 0.92    |
| Exclusion special days     |            | 4.4 (0.07) | 4.4 (0.06)  | 4.4 (0.07) | 0.98    |
| Exclusion special diets    |            | N/A        | N/A         | N/A        | N/A     |
| INRAN-SCAI (n=1479)        |            |            |             |            |         |
| Number of eating occasions | 3.9 (0.04) |            |             |            |         |
| Model 1                    |            | 4.2(0.10)  | 4.1 (0.07)  | 3.7 (0.05) | <0.0001 |
| Model 2                    |            | -          | -           | -          | -       |
| Model 3                    |            | -          | -           | -          | -       |
| Exclusion special days     |            | 3.9 (0.37) | 3.8 (0.36)  | 3.5 (0.35) | 0.0002  |
| Exclusion special diets    |            | -          | -           | -          | -       |

*Presented as mean (standard error). \*Sample size (n) refers to the number of recall days. Repeated measures ANOVA, including an unstructured covariance matrix to account for within-person correlation, was used to compare differences according to sedentary behaviour level. Model 1: adjusted for age and sex. Model 2: adjusted for age, sex, educational level, marital status, household income (except for INRAN-SCAI) and smoking. Model 3: Model 2 additionally adjusted for energy intake. N/A: not available.*

## Physical activity and reaching protein thresholds

### Main meals

**Table S8.** Odds ratios (OR) and 95% CI for the association between physical activity (PA) tertiles and frequency of main meals (0,1,2+) reaching protein thresholds in the Newcastle 85+ Study and LiLACS NZ

| PA tertiles                | Model 1          | Model 2          | Model 3          | Model 4          |
|----------------------------|------------------|------------------|------------------|------------------|
| <i>Newcastle 85+ Study</i> |                  |                  |                  |                  |
| <b>20g protein</b>         |                  |                  |                  |                  |
| Low                        | 0.79 (0.50-1.25) | 0.79 (0.48-1.29) | 0.81 (0.49-1.35) | 0.92 (0.52-1.65) |
| Intermediate               | 1.00 (ref)       | 1.00 (ref)       | 1.00 (ref)       | 1.00 (ref)       |
| High                       | 1.14 (0.75-1.73) | 1.11 (0.72-1.69) | 0.96 (0.62-1.49) | 0.84 (0.53-1.33) |
| <b>30g protein</b>         |                  |                  |                  |                  |
| Low                        | 0.72 (0.43-1.20) | 0.87 (0.50-1.49) | 0.92 (0.53-1.61) | 1.12 (0.59-2.12) |
| Intermediate               | 1.00 (ref)       | 1.00 (ref)       | 1.00 (ref)       | 1.00 (ref)       |
| High                       | 1.19 (0.76-1.85) | 1.19 (0.76-1.86) | 1.02 (0.64-1.64) | 0.97 (0.58-1.60) |
| <i>LiLACS NZ Non Māori</i> |                  |                  |                  |                  |
| <b>20g protein</b>         |                  |                  |                  |                  |
| Low                        | 0.93 (0.56-1.53) | 1.04 (0.60-1.83) | 1.06 (0.59-1.91) | 1.26 (0.67-2.37) |
| Intermediate               | 1.00 (ref)       | 1.00 (ref)       | 1.00 (ref)       | 1.00 (ref)       |
| High                       | 1.35 (0.82-2.24) | 1.38 (0.81-2.34) | 1.29 (0.74-2.27) | 1.14 (0.63-2.08) |
| <b>30g protein</b>         |                  |                  |                  |                  |
| Low                        | 0.81 (0.48-1.35) | 0.92 (0.52-1.63) | 0.95 (0.51-1.79) | 0.93 (0.48-1.82) |
| Intermediate               | 1.00 (ref)       | 1.00 (ref)       | 1.00 (ref)       | 1.00 (ref)       |
| High                       | 1.28 (0.76-2.17) | 1.33 (0.77-2.30) | 1.14 (0.63-2.09) | 1.15 (0.61-2.20) |
| <i>LiLACS NZ Māori</i>     |                  |                  |                  |                  |
| <b>20g protein</b>         |                  |                  |                  |                  |
| Low                        | 0.72 (0.35-1.47) | 0.99 (0.43-2.28) | 0.79 (0.34-1.86) | 0.64 (0.24-1.70) |
| Intermediate               | 1.00 (ref)       | 1.00 (ref)       | 1.00 (ref)       | 1.00 (ref)       |
| High                       | 1.89 (0.94-3.80) | 1.77 (0.81-3.88) | 1.23 (0.54-2.78) | 1.45 (0.60-3.50) |
| <b>30g protein</b>         |                  |                  |                  |                  |
| Low                        | 0.93 (0.43-1.98) | 1.38 (0.57-3.38) | 1.10 (0.41-2.91) | 1.07 (0.37-3.08) |
| Intermediate               | 1.00 (ref)       | 1.00 (ref)       | 1.00 (ref)       | 1.00 (ref)       |
| High                       | 2.11 (1.02-4.36) | 2.09 (0.91-4.80) | 1.43 (0.57-3.58) | 1.45 (0.55-3.79) |

*Model 1 included main meals threshold, sex and age (LiLACS only); model 2 was also adjusted for living alone, education, deprivation, smoking, and alcohol; model 3 was further adjusted for energy intake; model 4 was further adjusted for disease count, disability and swallowing problems*

**Table S9.** Reaching protein thresholds according to physical activity level in community-dwelling older adults from the Netherlands (DNFCS), Finland (FINDIET) and Italy (INRAN-SCAI)

|                                       | Physical activity level |                   |                   | p-value |
|---------------------------------------|-------------------------|-------------------|-------------------|---------|
|                                       | Low                     | Intermediate      | High              |         |
| DNFCS (n=1476 days)                   |                         |                   |                   |         |
| ≥2 eating occasions >20g protein (%)  |                         |                   |                   |         |
| Model 1                               | 26.9 (13.0-40.9)        | 42.2 (35.3-49.1)  | 49.1 (45.9-52.3)  | 0.0035  |
| Model 2                               | 28.0 (13.7-42.2)        | 43.3 (35.7-50.9)  | 49.9 (45.7-54.2)  | 0.0043  |
| Model 3                               | 33.6 (20.5-46.8)        | 43.5 (36.5-50.5)  | 48.5 (44.5-52.4)  | 0.048   |
| Model 4                               | 34.8 (21.2-48.4)        | 43.3 (36.6-49.9)  | 48.5 (44.8-52.3)  | 0.061   |
| Exclusion special days                | 34.2 (19.7-48.6)        | 43.2 (36.2-50.2)  | 48.3 (44.3-52.2)  | 0.079   |
| Exclusion special diets               | 39.2 (24.0-54.4)        | 44.5 (37.1-52.0)  | 49.4 (45.4-53.4)  | 0.23    |
| ≥ 2 eating occasions >30g protein (%) |                         |                   |                   |         |
| Model 1                               | 2.9 (-4.9-10.8)         | 8.3 (4.4-12.2)    | 10.3 (8.5-12.1)   | 0.16    |
| Model 2                               | 1.9 (-6.1-9.9)          | 7.7 (3.5-12.0)    | 9.8 (7.4-12.2)    | 0.12    |
| Model 3                               | 4.9 (-2.6-12.4)         | 7.8 (3.8-11.8)    | 9.0 (6.8-11.3)    | 0.50    |
| Model 4                               | 5.8 (-2.4-14.0)         | 7.8 (3.8-11.9)    | 9.0 (6.7-11.2)    | 0.67    |
| Exclusion special days                | 3.7 (-4.7-12.1)         | 6.9 (2.8-10.9)    | 8.6 (6.3-10.9)    | 0.41    |
| Exclusion special diets               | 5.7 (-3.7-15.1)         | 8.3 (3.7-12.9)    | 9.0 (6.6-11.5)    | 0.76    |
| ≥ 2 main meals >20g protein (%)       |                         |                   |                   |         |
| Model 1                               | 20.6 (6.7-34.6)         | 41.1 (34.2-48.0)* | 46.2 (42.9-49.4)  | 0.0015  |
| Model 2                               | 20.5 (6.2-34.8)         | 41.5 (33.9-49.1)* | 46.0 (41.7-50.3)  | 0.0018  |
| Model 3                               | 25.5 (12.1-38.9)        | 41.6 (34.5-48.7)* | 45.7 (40.7-48.7)  | 0.018   |
| Model 4                               | 27.2 (13.3-41.1)        | 41.4 (34.6-48.3)  | 44.7 (40.9-48.6)  | 0.039   |
| Exclusion special days                | 26.6 (11.9-41.2)        | 41.3 (34.2-48.4)  | 44.6 (40.6-48.6)* | 0.046   |
| Exclusion special diets               | 28.9 (13.3-44.6)        | 42.7 (35.0-50.4)  | 45.4 (41.3-49.5)  | 0.11    |
| ≥ 2 main meals >30g protein           |                         |                   |                   |         |
| Model 1                               | 2.8 (-4.8-10.4)         | 6.8 (3.0-10.6)    | 9.7 (7.9-11.5)    | 0.11    |
| Model 2                               | 1.6 (-6.2-9.4)          | 6.0 (1.9-10.2)    | 9.0 (6.7-11.3)    | 0.089   |
| Model 3                               | 4.1 (-3.3-11.6)         | 6.1 (2.2-10.1)    | 8.3 (6.1-10.6)    | 0.34    |
| Model 4                               | 4.9 (-3.2-13.0)         | 6.1 (2.2-10.1)    | 8.3 (6.1-10.5)    | 0.45    |
| Exclusion special days                | 2.7 (-5.6-11.0)         | 4.9 (0.9-9.0)     | 7.9 (5.6-10.2)    | 0.21    |
| Exclusion special diets               | 4.5 (-4.8-13.8)         | 6.6 (2.1-11.2)    | 8.2 (5.7-10.6)    | 0.62    |
| FINDIET (n=1734 days)                 |                         |                   |                   |         |
| ≥2 eating occasions >20g protein (%)  |                         |                   |                   |         |
| Model 1                               | 34.0 (27.5-40.5)        | 37.2 (33.9-40.5)  | 35.3 (29.5-41.1)  | 0.65    |
| Model 2                               | 37.3 (29.4-45.1)        | 39.0 (33.4-44.6)  | 38.0 (30.3-45.7)  | 0.88    |
| Model 3                               | 38.6 (32.0-45.3)        | 40.1 (35.4-44.8)  | 36.4 (29.9-42.8)  | 0.42    |
| Model 4                               | 40.5 (34.2-46.8)        | 40.9 (36.5-45.4)  | 36.0 (29.9-42.1)  | 0.20    |
| Exclusion special days                | 39.7 (33.2-46.2)        | 40.3 (35.7-44.9)  | 35.6 (29.2-41.9)  | 0.26    |

**Table S9.** Reaching protein thresholds according to physical activity level in community-dwelling older adults from the Netherlands (DNFCS), Finland (FINDIET) and Italy (INRAN-SCAI)

|                                       | Physical activity level |                  |                  | p-value |
|---------------------------------------|-------------------------|------------------|------------------|---------|
|                                       | Low                     | Intermediate     | High             |         |
| ≥ 2 eating occasions >30g protein (%) |                         |                  |                  |         |
| Model 1                               | 12.3 (8.0-16.6)         | 10.6 (8.4-12.8)  | 12.2 (8.4-16.0)  | 0.68    |
| Model 2                               | 13.6 (8.4-18.9)         | 11.9 (8.2-15.7)  | 14.6 (9.5-19.7)  | 0.47    |
| Model 3                               | 14.5 (10.0-18.9)        | 12.6 (9.4-15.8)  | 13.6 (9.2-17.8)  | 0.66    |
| Model 4                               | 14.4 (9.9-18.9)         | 12.6 (9.4-15.8)  | 13.6 (9.2-18.0)  | 0.66    |
| Exclusion special days                | 15.3 (10.7-19.9)        | 12.8 (9.5-16.0)  | 13.7 (9.2-18.2)  | 0.52    |
| ≥ 2 main meals >20g protein (%)       |                         |                  |                  |         |
| Model 1                               | 24.8 (18.7-31.0)        | 27.5 (24.4-30.7) | 26.6 (21.1-32.0) | 0.74    |
| Model 2                               | 27.2 (19.8-34.6)        | 28.3 (23.1-33.6) | 27.6 (20.4-34.8) | 0.94    |
| Model 3                               | 28.2 (21.5-34.8)        | 29.1 (24.4-33.9) | 26.5 (20.0-33.0) | 0.66    |
| Model 4                               | 29.4 (23.0-35.9)        | 29.7 (25.1-34.3) | 26.2 (19.9-32.5) | 0.47    |
| Exclusion special days                | 28.3 (21.7-35.0)        | 29.2 (24.5-33.9) | 26.4 (19.8-32.9) | 0.62    |
| ≥ 2 main meals >30g protein (%)       |                         |                  |                  |         |
| Model 1                               | 8.4 (4.7-12.2)          | 8.2 (6.2-10.1)   | 7.8 (4.5-11.2)   | 0.97    |
| Model 2                               | 9.2 (4.60-13.8)         | 8.4 (5.2-11.7)   | 8.5 (4.1-13.0)   | 0.95    |
| Model 3                               | 9.7 (5.6-13.9)          | 8.9 (5.9-11.9)   | 7.9 (3.8-11.9)   | 0.74    |
| Model 4                               | 9.7 (5.6-13.9)          | 8.9 (5.9-11.8)   | 7.9 (3.8-11.9)   | 0.75    |
| Exclusion special days                | 10.2 (5.9-14.5)         | 8.9 (5.9-11.9)   | 7.8 (3.6-12.0)   | 0.64    |
| INRAN-SCAI (n=1530 days)              |                         |                  |                  |         |
| ≥2 eating occasions >20g protein (%)  |                         |                  |                  |         |
| Model 1                               | 63.8 (55.8-71.8)        | 63.5 (59.0-68.0) | 70.0 (65.5-74.4) | 0.11    |
| Model 2                               | 58.2 (47.3-69.1)        | 56.7 (47.7-65.7) | 62.0 (52.8-71.2) | 0.24    |
| Model 3                               | 58.0 (49.0-67.1)        | 56.3 (48.9-63.8) | 58.0 (50.4-65.6) | 0.80    |
| Model 4                               | 60.8 (52.4-69.2)        | 60.2 (53.3-67.2) | 62.2 (55.1-69.3) | 0.72    |
| Exclusion special days                | 62.7 (54.0-71.4)        | 61.1 (54.1-68.1) | 62.6 (55.4-69.7) | 0.83    |
| Exclusion special diets               | 60.5 (51.9-69.0)        | 61.0 (54.1-68.0) | 62.4 (55.3-69.4) | 0.82    |
| ≥ 2 eating occasions >30g protein (%) |                         |                  |                  |         |
| Model 1                               | 31.1 (23.5-38.7)        | 33.6 (29.3-37.8) | 35.7 (31.4-40.0) | 0.56    |
| Model 2                               | 28.5 (18.1-38.9)        | 30.1 (21.5-38.7) | 31.8 (21.5-38.7) | 0.73    |
| Model 3                               | 28.3 (20.1-36.6)        | 29.7 (22.9-36.5) | 27.4 (20.4-34.3) | 0.62    |
| Model 4                               | 29.0 (20.7-37.2)        | 30.6 (23.8-37.4) | 28.3 (21.4-35.3) | 0.63    |
| Exclusion special days                | 30.6 (21.8-39.5)        | 31.0 (23.9-38.2) | 29.1 (21.9-36.3) | 0.75    |
| Exclusion special diets               | 28.4 (19.8-37.0)        | 31.7 (24.8-38.6) | 29.4 (22.3-36.4) | 0.53    |
| ≥ 2 main meals >20g protein (%)       |                         |                  |                  |         |
| Model 1                               | 62.7 (54.6-70.7)        | 63.2 (58.7-67.7) | 69.7 (65.2-74.2) | 0.096   |

**Table S9.** Reaching protein thresholds according to physical activity level in community-dwelling older adults from the Netherlands (DNFCS), Finland (FINDIET) and Italy (INRAN-SCAI)

|                                       | Physical activity level |                  |                  | p-value |
|---------------------------------------|-------------------------|------------------|------------------|---------|
|                                       | Low                     | Intermediate     | High             |         |
| Model 2                               | 57.3 (46.3-68.3)        | 56.6 (47.5-65.7) | 61.9 (52.6-71.2) | 0.23    |
| Model 3                               | 57.1 (48.0-66.3)        | 56.2 (48.6-63.8) | 57.9 (50.2-65.6) | 0.81    |
| Model 4                               | 59.9 (51.3-68.4)        | 60.0 (52.9-67.1) | 62.1 (54.9-69.3) | 0.67    |
| Exclusion special days                | 61.6 (52.6-70.5)        | 61.1 (53.9-68.2) | 62.5 (55.2-69.8) | 0.87    |
| Exclusion special diets               | 59.3 (50.6-68.1)        | 60.8 (53.8-67.9) | 62.2 (55.1-69.4) | 0.72    |
| <b>≥ 2 main meals &gt;30g protein</b> |                         |                  |                  |         |
| Model 1                               | 31.1 (23.5-38.8)        | 33.4 (29.2-37.7) | 35.6 (31.3-39.8) | 0.57    |
| Model 2                               | 28.5 (18.0-38.9)        | 29.9 (21.3-38.6) | 31.6 (22.8-40.4) | 0.74    |
| Model 3                               | 28.3 (20.1-36.6)        | 29.5 (22.7-36.4) | 27.2 (20.3-34.2) | 0.63    |
| Model 4                               | 29.0 (20.7-37.2)        | 30.4 (23.6-37.2) | 28.2 (21.2-35.2) | 0.65    |
| Exclusion special days                | 30.7 (21.8-39.6)        | 31.1 (23.9-38.2) | 29.0 (21.7-36.3) | 0.72    |
| Exclusion special diets               | 28.4 (19.8-37.1)        | 31.5 (24.5-38.5) | 29.2 (22.1-36.3) | 0.56    |

*Number of meals reaching protein thresholds presented as % (95%-CI).*

*Model 1: adjusted for age and sex. Model 2: adjusted for age, sex, educational level, marital status, and smoking. Model 3: Model 2 additionally adjusted for energy intake. Model 4: model 3 additionally adjusted for protein intake status (<0.8 g/kg aBW/day).*

**Table S10.** Number of main meals providing  $\geq 20$  or 30 grams of protein according to sedentary behaviour in community-dwelling older adults from Finland (FINDIET) and Italy (INRAN-SCAI)

|                                | Sedentary behaviour |                  |                  | p-value |
|--------------------------------|---------------------|------------------|------------------|---------|
|                                | <4 hrs/day          | 4-6 hrs/day      | >6 hrs/day       |         |
| FINDIET (n=1596)               |                     |                  |                  |         |
| ≥2 eating occasions >20 g (%)  |                     |                  |                  |         |
| Model 1                        | 38.9 (34.0-43.7)    | 34.4 (30.3-38.5) | 36.8 (31.0-42.7) | 0.39    |
| Model 2                        | 38.3 (30.9-45.7)    | 32.9 (26.0-39.8) | 34.6 (26.6-42.6) | 0.26    |
| Model 3                        | 39.0 (32.8-45.2)    | 33.0 (27.2-38.8) | 35.1 (28.4-41.8) | 0.096   |
| Excluding special days         | 39.1 (33.0-45.1)    | 32.8 (27.1-38.5) | 35.0 (28.5-41.6) | 0.068   |
| Excluding special diets        | N/A                 | N/A              | N/A              |         |
| ≥ 2 main meals >20 g (%)       |                     |                  |                  |         |
| Model 1                        | 28.5 (23.9-33.0)    | 25.8 (21.9-29.6) | 28.4 (22.8-33.9) | 0.60    |
| Model 2                        | 26.6 (19.6-33.6)    | 23.4 (16.9-30.0) | 25.5 (18.0-33.1) | 0.58    |
| Model 3                        | 27.1 (20.9-33.4)    | 23.5 (17.7-29.4) | 25.9 (19.1-32.6) | 0.42    |
| Excluding special days         | 26.8 (20.6-33.1)    | 23.3 (17.4-29.2) | 25.4 (18.6-32.2) | 0.44    |
| Excluding special diets        | N/A                 | N/A              | N/A              |         |
| ≥ eating occasions >30 g (%)   |                     |                  |                  |         |
| Model 1                        | 9.9 (6.7-13.1)      | 11.9 (9.1-14.6)  | 11.2 (7.3-15.1)  | 0.65    |
| Model 2                        | 10.3 (5.3-15.2)     | 12.9 (8.3-17.5)  | 12.2 (6.9-17.6)  | 0.48    |
| Model 3                        | 10.7 (6.5-15.0)     | 13.0 (9.1-17.0)  | 12.5 (7.9-17.1)  | 0.47    |
| Excluding special days         | 10.7 (6.4-15.0)     | 13.3 (9.2-17.3)  | 13.3 (8.6-18.0)  | 0.36    |
| Excluding special diets        | N/A                 | N/A              | N/A              |         |
| ≥ 2 main meals >30 g (%)       |                     |                  |                  |         |
| Model 1                        | 8.2 (5.3-11.0)      | 7.9 (5.5-10.3)   | 9.1 (5.7-12.6)   | 0.85    |
| Model 2                        | 7.4 (3.0-11.7)      | 7.8 (3.7-11.9)   | 8.8 (4.1-13.5)   | 0.82    |
| Model 3                        | 7.7 (3.7-11.6)      | 7.9 (4.2-11.6)   | 9.0 (4.7-13.3)   | 0.80    |
| Excluding special days         | 7.5 (3.5-11.6)      | 7.8 (4.0-11.6)   | 9.7 (5.3-14.0)   | 0.58    |
| Excluding special diets        | N/A                 | N/A              | N/A              |         |
| INRAN-SCAI (n=1479)            |                     |                  |                  |         |
| ≥2 eating occasions >20 g (%)  |                     |                  |                  |         |
| Model 1                        | 58.2 (50.7-65.6)    | 69.5 (64.2-74.8) | 67.9 (63.8-72.1) | 0.039   |
| Model 2                        | 51.9 (43.2-60.6)    | 63.9 (56.9-71.0) | 62.2 (56.0-68.4) | 0.025   |
| Model 3                        | 52.3 (45.2-59.4)    | 61.5 (55.7-67.3) | 61.7 (56.7-66.8) | 0.023   |
| Excluding special days         | 59.0 (0.52-0.66)    | 62.9 (57.2-68.5) | 65.4 (60.5-70.4) | 0.19    |
| Excluding special diets        | 54.2 (47.5-60.9)    | 62.7 (57.2-68.2) | 65.3 (60.4-70.2) | 0.0052  |
| ≥ 2 main meals >20 g (%)       |                     |                  |                  |         |
| Model 1                        | 58.1 (50.6-65.6)    | 69.1 (63.7-74.5) | 67.4 (63.2-71.6) | 0.051   |
| Model 2                        | 52.0 (43.2-60.7)    | 63.5 (56.4-70.6) | 61.7 (55.4-70.0) | 0.038   |
| Model 3                        | 52.4 (45.2-59.6)    | 61.1 (55.2-66.9) | 61.2 (56.1-66.4) | 0.039   |
| Excluding special days         | 59.1 (51.8-66.4)    | 62.3 (56.6-68.1) | 65.1 (60.0-70.2) | 0.24    |
| Excluding special diets        | 54.3 (47.4-61.1)    | 62.2 (56.6-67.8) | 64.6 (59.7-69.6) | 0.012   |
| ≥ 2 eating occasions >30 g (%) |                     |                  |                  |         |
| Model 1                        | 27.2 (20.2-34.3)    | 32.9 (27.8-37.9) | 37.4 (33.5-41.4) | 0.042   |
| Model 2                        | 23.5 (15.2-31.7)    | 29.8 (23.1-36.4) | 33.6 (27.8-39.5) | 0.046   |

**Table S10.** Number of main meals providing  $\geq 20$  or 30 grams of protein according to sedentary behaviour in community-dwelling older adults from Finland (FINDIET) and Italy (INRAN-SCAI)

|                                 | Sedentary behaviour |                  |                  | p-value |
|---------------------------------|---------------------|------------------|------------------|---------|
|                                 | <4 hrs/day          | 4-6 hrs/day      | >6 hrs/day       |         |
| Model 3                         | 23.9 (17.5-30.4)    | 27.2 (21.9-32.4) | 33.1 (28.5-37.8) | 0.0063  |
| Excluding special days          | 26.1 (18.9-33.3)    | 28.7 (23.0-34.3) | 34.3 (29.3-39.3) | 0.029   |
| Excluding special diets         | 24.1 (17.4-30.7)    | 27.9 (22.4-33.4) | 34.7 (29.9-39.6) | 0.0019  |
| $\geq 2$ main meals $>30$ g (%) |                     |                  |                  |         |
| Model 1                         | 27.2 (20.2-34.3)    | 32.9 (27.8-37.9) | 37.2 (33.2-41.1) | 0.050   |
| Model 2                         | 23.4 (15.2-31.7)    | 29.7 (23.1-36.4) | 33.3 (27.4-39.2) | 0.056   |
| Model 3                         | 23.9 (17.4-30.4)    | 27.2 (21.9-32.4) | 32.8 (28.2-37.5) | 0.0094  |
| Excluding special days          | 26.2 (18.9-33.4)    | 28.7 (23.0-34.4) | 34.3 (29.2-39.3) | 0.033   |
| Excluding special diets         | 24.0 (17.3-30.7)    | 27.9 (22.3-33.4) | 34.4 (29.5-39.3) | 0.0031  |

*Presented as % (95%-CI). Model 1: adjusted for age and sex. Model 2: adjusted for age, sex, educational level, marital status, household income (except for INRAN-SCAI) and smoking. Model 3: Model 2 additionally adjusted for energy intake. N/A Not available*

## Physical activity and pattern of protein intake over the day

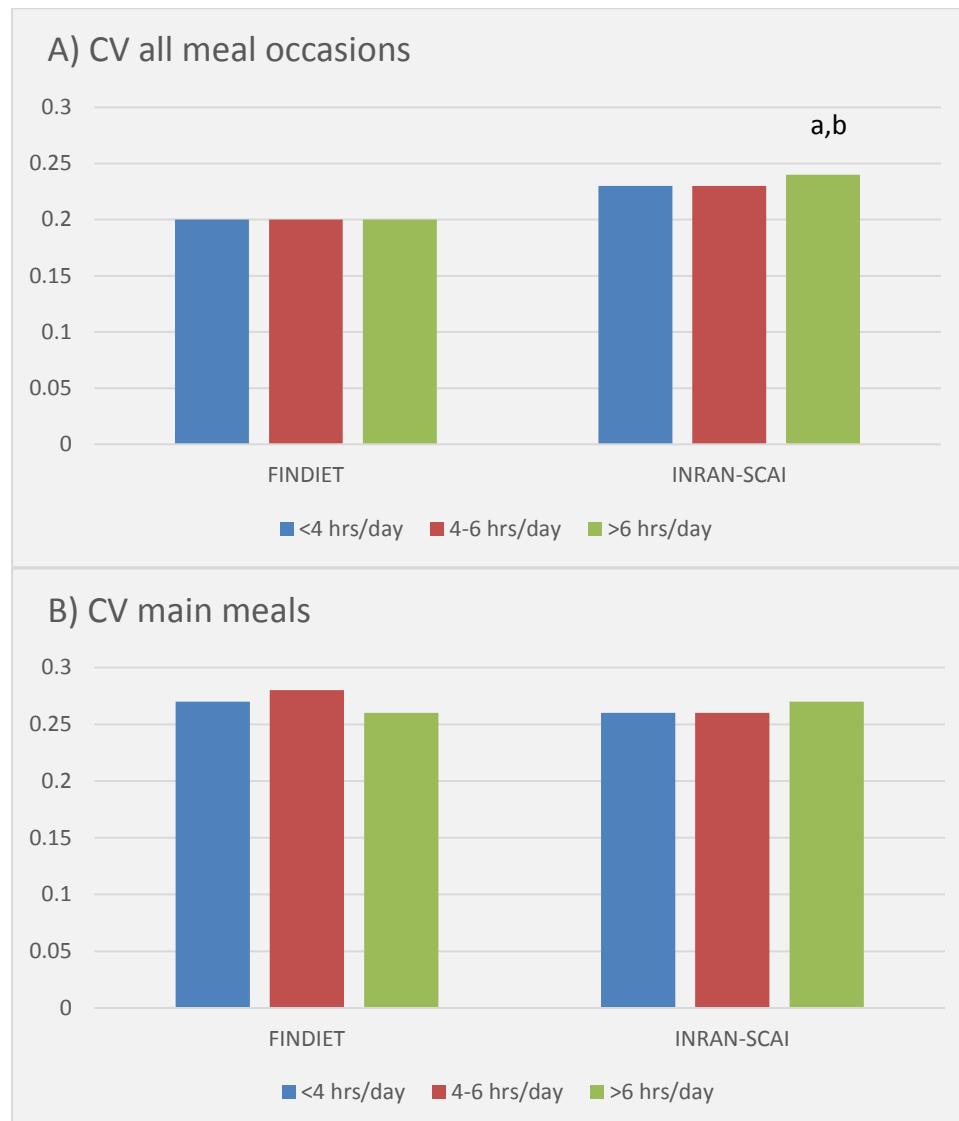

**Figure S4.** Coefficient of variation of protein intake over A) all eating occasions or B) main meals only according to sedentary behaviour in Finland (FINDIET) and Italy (INRAN-SCAI). A lower CV indicates a more evenly distributed protein intake. Adjusted for age, sex, educational level, marital status, and smoking. <sup>a</sup> Differs from those with < 4 hrs sedentary behaviour per day  $p<0.05$ . <sup>b</sup> Differs from those with 4-6 hrs sedentary behaviour per day  $p<0.05$ .

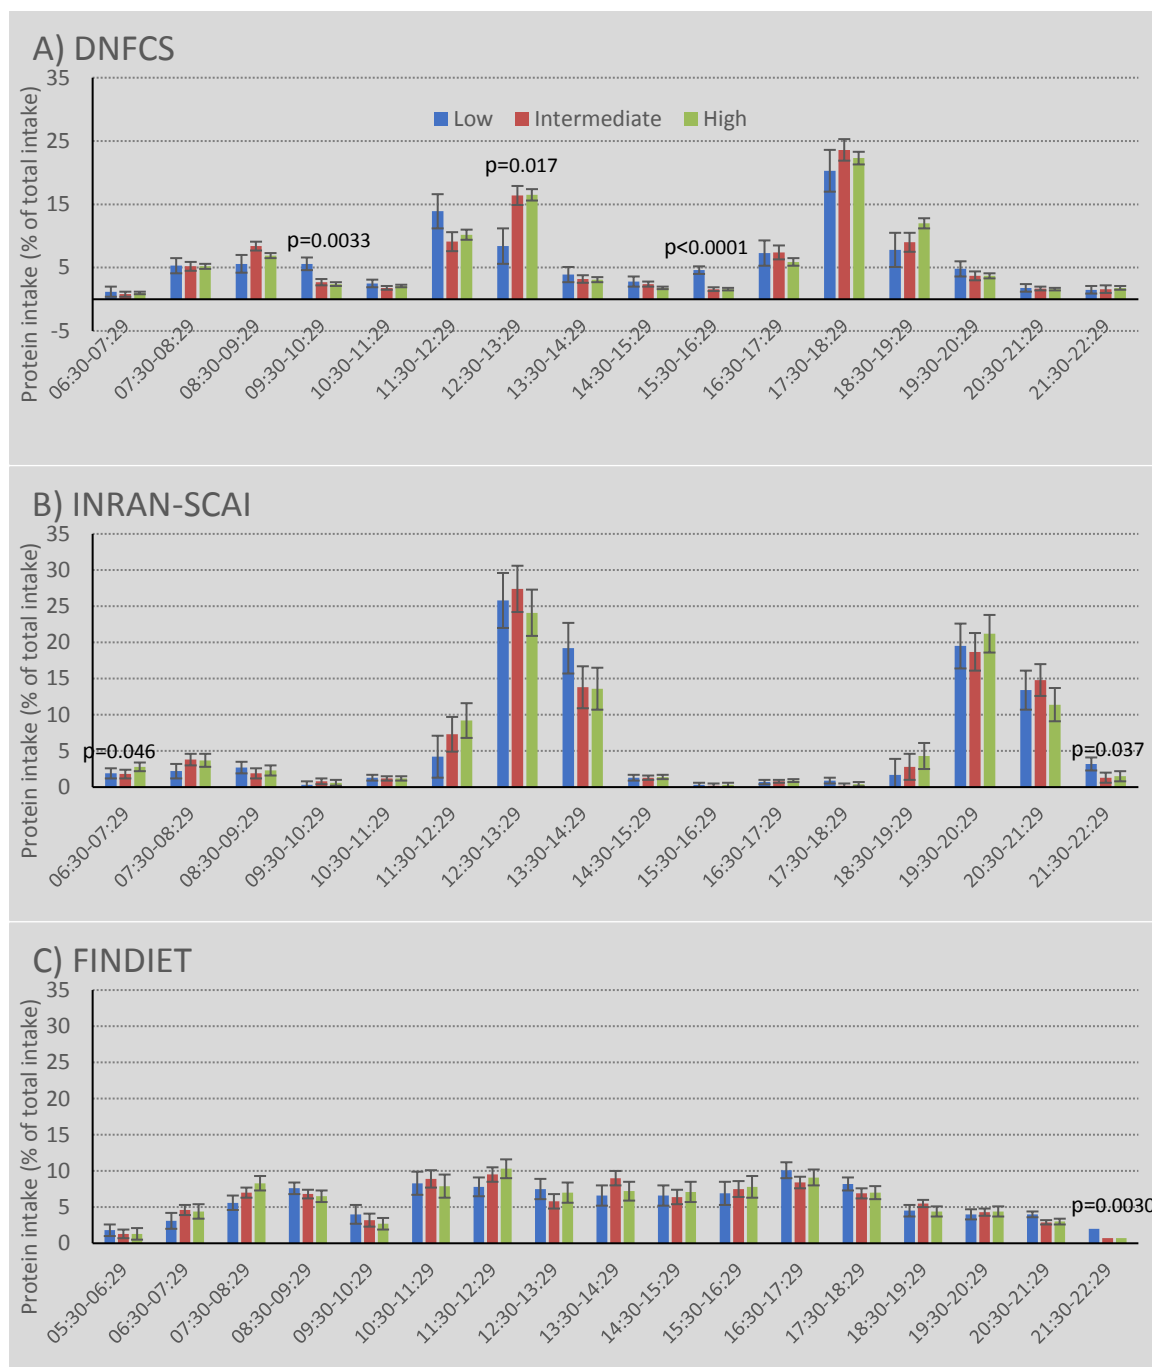

**Figure S5.** Proportion of protein intake (% of total intake) across time of the day and stratified by physical activity level among community-dwelling older adults in A) the Netherlands (DNFCS), B) Italy (INRAN-SCAI), and C) Finland (FINDIET). Adjusted for age, sex, educational level, marital status, household income, and smoking.

## References

1. Mendonça, N., et al., *Prevalence and determinants of low protein intake in very old adults: insights from the Newcastle 85+ Study*. European journal of nutrition, 2018. **57**(8): p. 2713-2722.
2. Granic, A., et al., *Dietary patterns and socioeconomic status in the very old: the Newcastle 85+ Study*. PloS one, 2015. **10**(10).
3. Noble, M., M.E. Wilkinson, and M.H. Barnes, *The English indices of deprivation 2007*. 2008.
4. Salmond, C., P. Crampton, and J. Atkinson, *NZDep2006 Index of Deprivation*, U.o.O. Department of Public Health, Editor. 2007, Ministry of Health: Wellington.
